# Supplementary material for: Human Sperm Capacitation Involves the Regulation of the Tyr-Phosphorylation Level of the Anion Exchanger 1 (AE1)
Source: MDPI journal article supplement (doi:10.3390/ijms21114063), 2020-06-05
Supplement: s1 [file s1]

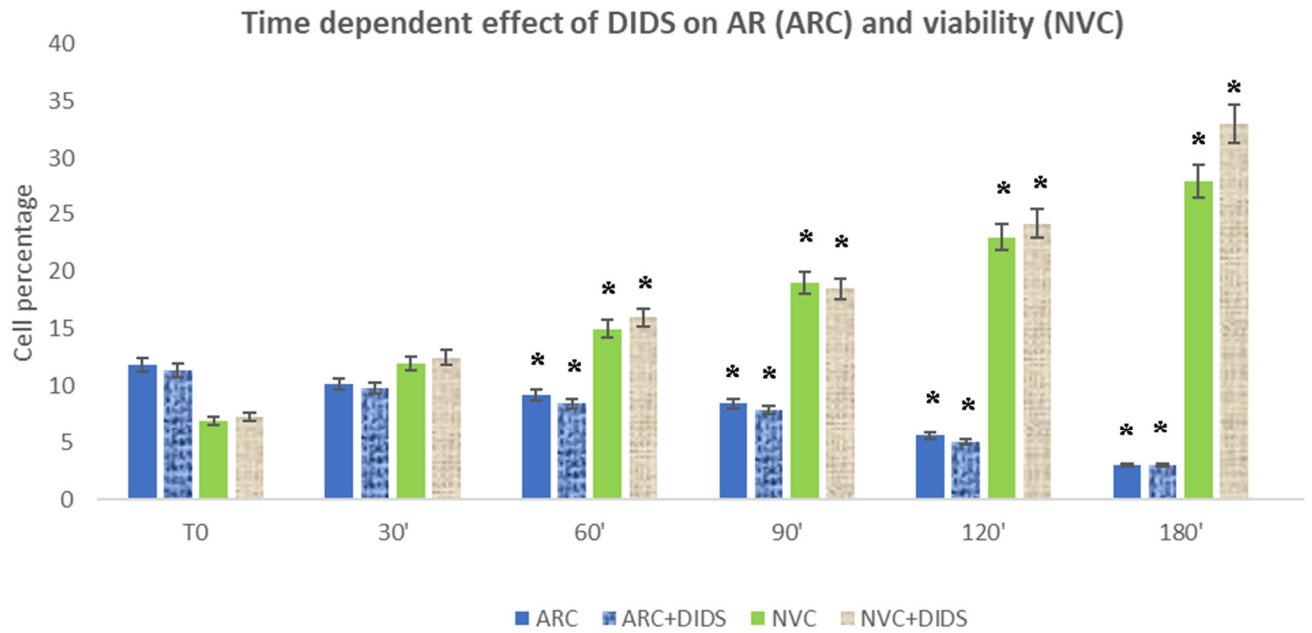

**Figure S1. Time-dependent effect of 100  $\mu$ M DIDS on sperm AR and viability.** Sperm, isolated and purified as described in Methods, were resuspended in non-capacitating buffer (BWW in the absence of  $\text{HCO}_3^-$ ) and immediately processed for AR and viability (detected with PI labeling of not viable cells: NVC at (T0) or incubated for up to 180 min in the absence or presence of DIDS in PSW without BSA. Sperm were analyzed for acrosome-reacted cells (ARC) and viability, NVC, by immunofluorescence cytochemistry (see Methods). Values are expressed as percentages of cells. Comparison to T0 was performed by one-way analysis of variance (ANOVA) with Dunnett's *post hoc* test. Values represent the mean S.D. of at least 8 experiments. \*Comparison to T0,  $p < 0.005$ ; \*\*.

**Table S1. Sperm motility and kinematic parameters observed in different samples.** Motility and kinematic parameters of spermatozoon were evaluated with computer-assisted sperm analysis (CASA) at T<sub>0</sub> (before starting incubation) and after 180 min of incubation in capacitating conditions in absence (C) or presence of DIDS (1, 50 or 100  $\mu$ M), I-172 (1, 5, 10  $\mu$ M) or both (C+100  $\mu$ M DIDS + 5  $\mu$ M I-172). Motility = progressive and non-progressive motility (%); VSL = straight-line velocity ( $\mu$ m/s); VAP = average path velocity ( $\mu$ m/s); ALH = amplitude of lateral head displacement ( $\mu$ m).

|                | Motility (%)                 | VSL ( $\mu$ m/s)             | VAP ( $\mu$ m/s)            | ALH ( $\mu$ m)             |
|----------------|------------------------------|------------------------------|-----------------------------|----------------------------|
| T <sub>0</sub> | 69 $\pm$ 3.2                 | 58.4 $\pm$ 8.9               | 54.0 $\pm$ 6.7              | 3.1 $\pm$ 0.5              |
| C              | 76 $\pm$ 7.3                 | 77.8 $\pm$ 13.9              | 69.6 $\pm$ 11.0             | 4.9 $\pm$ 0.9              |
| C+10 DIDS-     | 58 $\pm$ 8.5 <sup>a</sup>    | 56.9 $\pm$ 10.4 <sup>a</sup> | 59.3 $\pm$ 7.0 <sup>a</sup> | 4.1 $\pm$ 0.8 <sup>a</sup> |
| C+50 DIDS      | 45.7 $\pm$ 12.0 <sup>a</sup> | 45.3 $\pm$ 9.4 <sup>a</sup>  | 48.3 $\pm$ 9.5 <sup>a</sup> | 3.6 $\pm$ 0.8 <sup>a</sup> |
| C+100DIDS      | 32.3 $\pm$ 9.5 <sup>a</sup>  | 38.5 $\pm$ 8.5 <sup>a</sup>  | 40.1 $\pm$ 5.5 <sup>a</sup> | 2.8 $\pm$ 0.3 <sup>a</sup> |
| C+1 I-172      | 45.9 $\pm$ 9.2 <sup>a</sup>  | 59.3 $\pm$ 6.7 <sup>a</sup>  | 52.3 $\pm$ 9.4 <sup>a</sup> | 3.8 $\pm$ 0.8 <sup>a</sup> |
| C+5 I-172      | 36.6 $\pm$ 9.0 <sup>a</sup>  | 29.9 $\pm$ 7.5 <sup>a</sup>  | 44.9 $\pm$ 6.5 <sup>a</sup> | 2.6 $\pm$ 0.5 <sup>a</sup> |
| C+10 I-172     | 28.4 $\pm$ 8.6 <sup>a</sup>  | 20.7 $\pm$ 4.9 <sup>a</sup>  | 33.5 $\pm$ 4.5 <sup>a</sup> | 2.5 $\pm$ 0.4 <sup>a</sup> |
| C++            | 15.2 $\pm$ 0.6 <sup>a</sup>  | 0.9 $\pm$ 0.4 <sup>a</sup>   | 20.5 $\pm$ 0.8 <sup>a</sup> | 2.0 $\pm$ 0.2 <sup>a</sup> |

<sup>a</sup>:  $p < 0.01$ , comparing each parameter under different treatment against C, by using Dunnett's test, following a significant one-way ANOVA. Values are expressed as the mean  $\pm$  SD.

**Table S2**

Sperm lysates, immediately processed (T0) or incubated for 120 min in the absence (C) or presence of +5 $\mu$ M I-172 (C+I-172), 100 $\mu$ M DIDS (C+DIDS), or both (C++). were immunoprecipitated with anti AE1 or anti-Syk antibodies and immunoblotted with anti-P-Tyr antibodies.

90 kDa bands corresponding to the phosphorylated proteins were densitometrically estimated, normalized to the 90 kDa protein corresponding to AE1, as revealed on the AE1-IP after stripping and re-probing with anti-AE1 antibody, or to the 72 kDa Syk band, as revealed on the Syk-IP after stripping and re-probing with anti-Syk antibody, and statistically analyzed. Data show the means  $\pm$ SD of relative units (RU) of six separate experiments. Comparison to C values:

\* $p < 0.001$ , Comparison of C to T0 values: \*\* $p < 0.05$ . Student's *t* test for paired data.

|                | Tyr-P          |                |
|----------------|----------------|----------------|
|                | Anti-AE1-IP    | Anti-Syk-IP    |
| T <sub>0</sub> | 253 $\pm$ 15   | 185 $\pm$ 17   |
| C              | 754 $\pm$ 45** | 470 $\pm$ 18** |
| C+I-172        | 225 $\pm$ 12 * | 168 $\pm$ 22 * |
| C+DIDS         | 204 $\pm$ 11 * | 192 $\pm$ 18 * |
| C++            | 115 $\pm$ 34 * | 175 $\pm$ 20 * |

## Syk-IP

WB: anti-P-Tyr

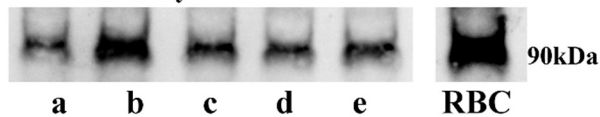

**Figure S2. Co-immunoprecipitation of spAE1 with Syk.** Sperm cells were either immediately processed (T0, lane a) or incubated for 120 min in the absence (C, lane b) or presence of +5 $\mu$ M I-172 (C+I, lane c), 100 $\mu$ M DIDS (C+DIDS, lane d) or both (C++, lane e). Sperm cells were then lysed and immunoprecipitated with anti Syk antibody and immunoblotted with anti-P-Tyr antibodies. The RBC lane shows the 90 kDa band corresponding to eAE1 revealed with anti-P-Tyr antibodies after probing a membrane lysate from human RBCs. The figure is representative of six separate experiments.

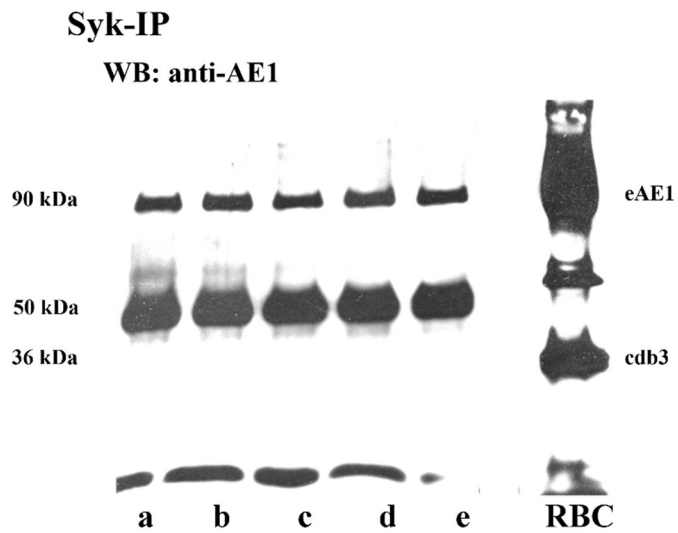

**Figure S3.** Sperm cells were either immediately processed (T0, lane a) or incubated for 120 min in the absence (C, lane b) or presence of +50M I-172 (C+5I, lane c), 1000M DIDS C+DIDS, (lane d) or both (C++, lane e). Sperm cells were lysed and immunoprecipitated with anti Syk antibody and immunoblotted with anti-AE1 antibodies. The RBC lane shows the Western blotting profile revealed by probing erythrocyte membranes with anti-AE1 antibodies. The figure is representative of 6 separate experiments
